# Supplementary material for: Structural, luminescence and magnetic properties of Yb3+-Er3+codoped Gd2O3hierarchical architectures
Source: Royal Society of Chemistry journal article supplement (doi:10.1039/c4ce01970a), 2014-11-28
Supplement: c4ce01970a1.pdf [file c4ce01970a1.pdf]

## Electronic Supporting Information

# Structural, Luminescent and Magnetic Properties of Yb<sup>3+</sup>- Er<sup>3+</sup> Doped Gd<sub>2</sub>O<sub>3</sub> Hierarchical Architectures

Dekang Xu<sup>1</sup>, Yueli Zhang\*<sup>1,2</sup>, Shenghong Yang<sup>1</sup>

<sup>1</sup> State Key Laboratory of Optoelectronic Materials and Technologies, School of Physics & Engineering, Sun Yat-sen University, Guangzhou 510275, P.R. China

<sup>2</sup> State Key Laboratory of Crystal Material, Shandong University, Jinan 250100, P.R. China

\*Corresponding author E-mail addresses: [stszyl@mail.sysu.edu.cn](mailto:stszyl@mail.sysu.edu.cn)

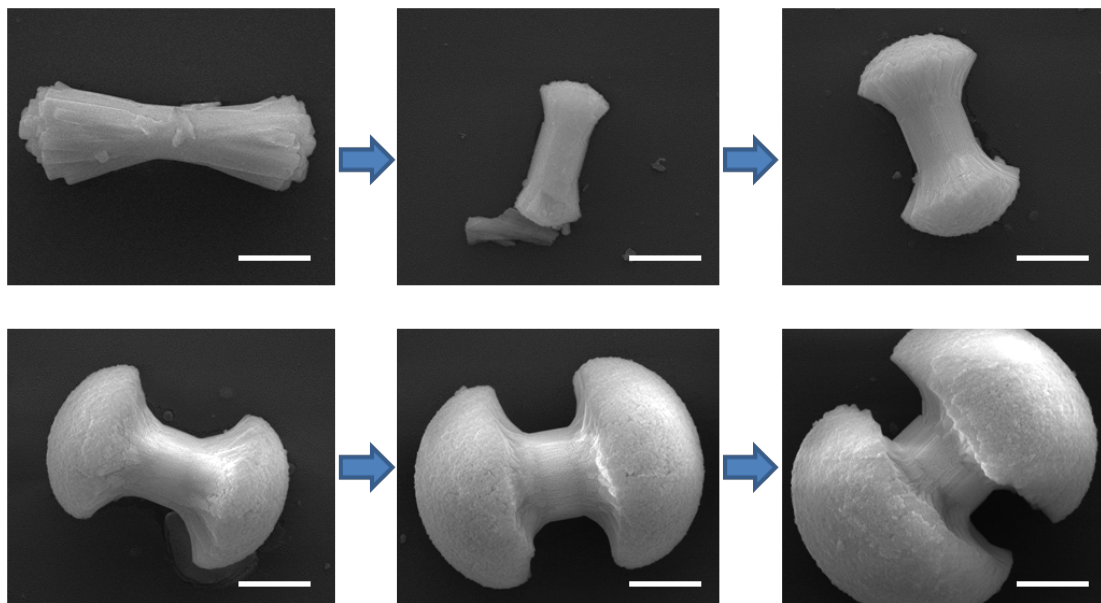

**Fig.S1** SEM images (performed on SEM #1) of  $\text{Gd}(\text{OH})_3$  micro-crystals prepared in 12 h (bar = 2  $\mu\text{m}$ ). The evolutionary morphology of particles can be found in the same sample, which indicates the growth process of dumbbell-shape  $\text{Gd}(\text{OH})_3$  microcrystals should be time-dependent.

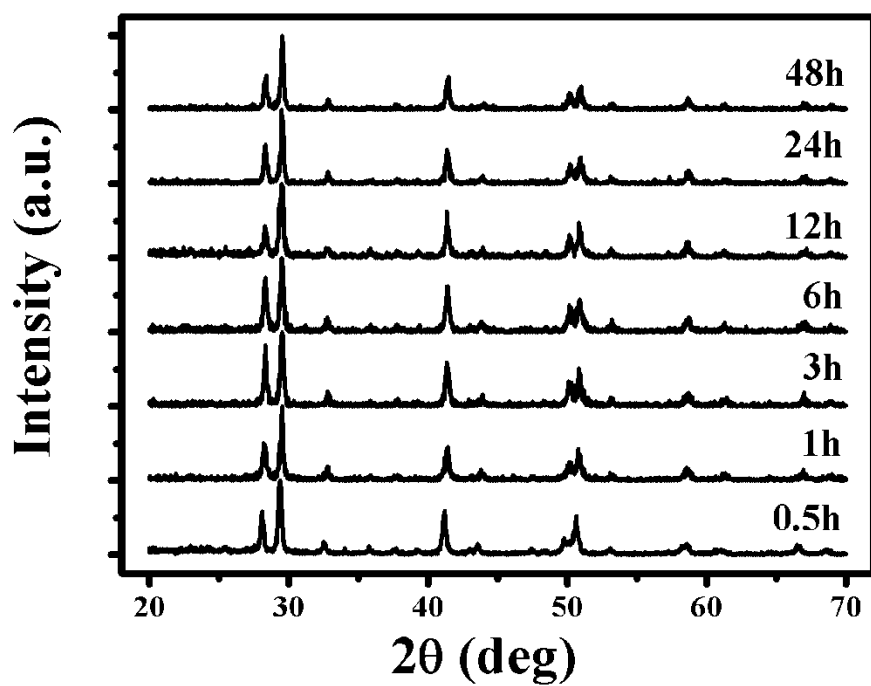

**Fig.S2** XRD patterns of Gd(OH)<sub>3</sub> at different reaction times. All samples are showing hexagonal phase.

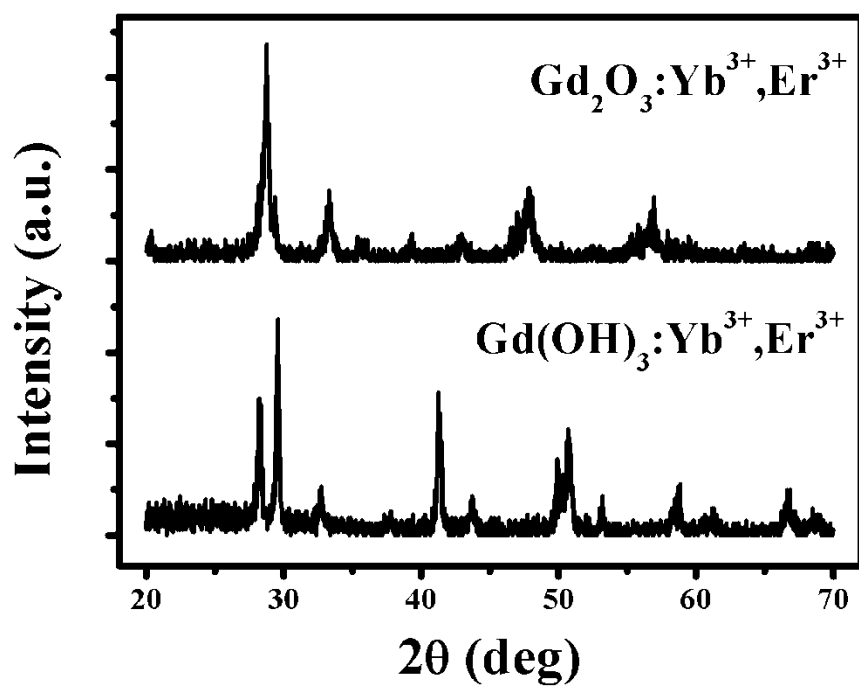

**Fig.S3** XRD patterns of  $\text{Yb}^{3+}$ ,  $\text{Er}^{3+}$  co-doped  $\text{Gd}(\text{OH})_3$  and  $\text{Gd}_2\text{O}_3$ . The lanthanide doping precursor has the same hexagonal structure with the non-doped precursor. And

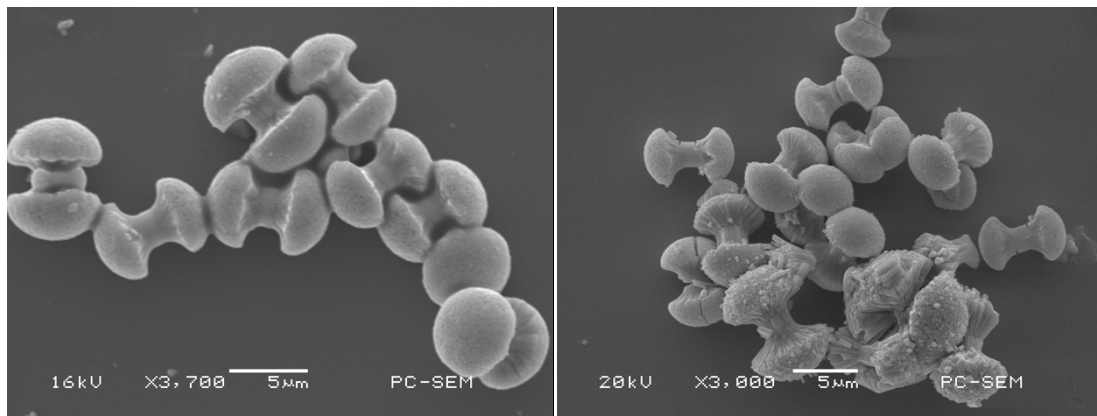

**Fig.S4** SEM images of Yb<sup>3+</sup>/Er<sup>3+</sup> co-doped Gd(OH)<sub>3</sub> and Gd<sub>2</sub>O<sub>3</sub>.

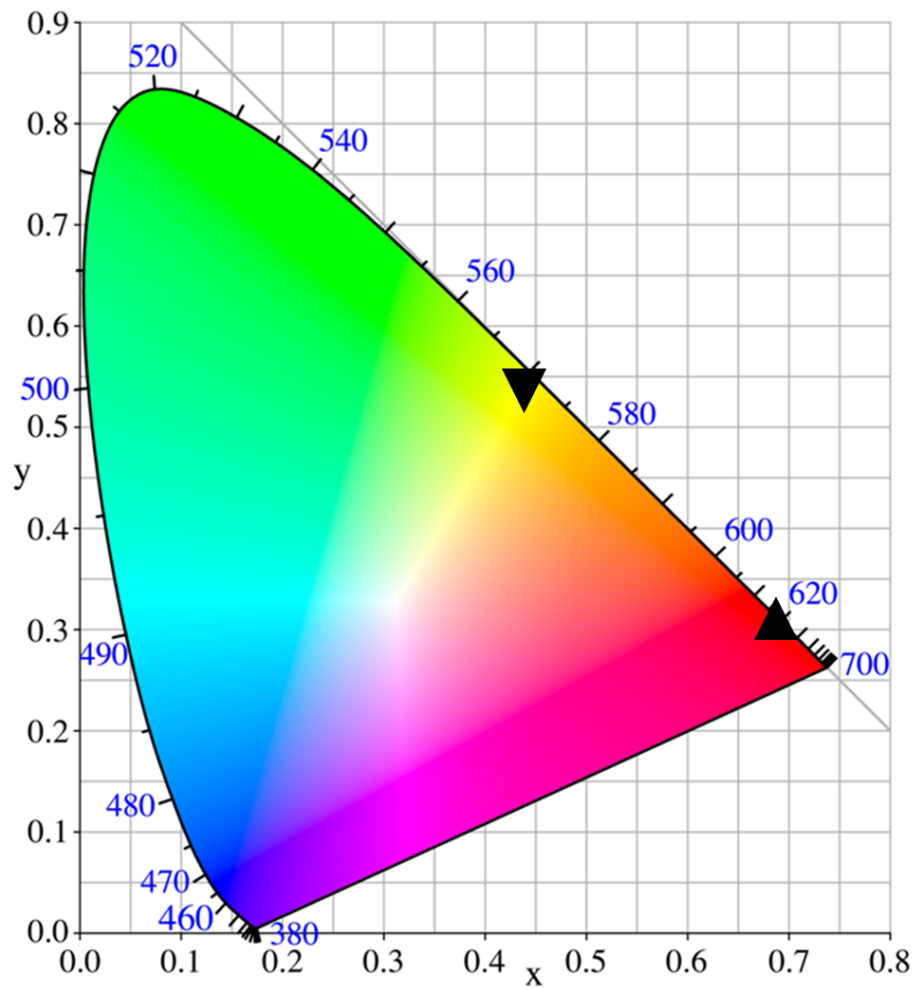

**Fig.S5** CIE chromaticity coordinate diagram in UC and QS processes. The upward triangle and the downward triangle represent pure red UC emission and yellow QS emission, respectively.

**Table S1** Particle sizes and corresponding magnetic mass susceptibilities of reported Gd<sup>3+</sup>-based complexes.

|                                                        | Size (nm)       | Magnetic mass susceptibility (emu g <sup>-1</sup> Oe <sup>-1</sup> ) | Ref       |
|--------------------------------------------------------|-----------------|----------------------------------------------------------------------|-----------|
| KGdF <sub>4</sub> :Yb,Er                               | 11.6            | $5.27 \times 10^{-5}$                                                | 1         |
| KGdF <sub>4</sub>                                      | 49              | $1.03 \times 10^{-4}$                                                | 2         |
| KGdF <sub>4</sub>                                      | 25              | $9.85 \times 10^{-5}$                                                | 3         |
| BaGdF <sub>5</sub>                                     | 37              | $7.0 \times 10^{-5}$                                                 | 4         |
| BaGdF <sub>5</sub>                                     | 18.2            | $6.91 \times 10^{-5}$                                                | 5         |
| NaGdF <sub>4</sub> :Yb,Er                              | 845             | $9.82 \times 10^{-5}$                                                | 6         |
| NaYb <sub>0.15</sub> Gd <sub>0.85</sub> F <sub>4</sub> | 10              | $7.74 \times 10^{-5}$                                                | 7         |
| Gd <sub>2</sub> O <sub>3</sub>                         | 250(D)/2000(L)  | $2.8 \times 10^{-5}$                                                 | 8         |
| Gd <sub>2</sub> O <sub>3</sub>                         | 7000(D)/9000(L) | $1.132 \times 10^{-4}$                                               | this work |

- [1] P.K. Chu et al., Magnetic and upconverted luminescent properties of multifunctional lanthanide doped cubic KGdF<sub>4</sub> nanocrystals. *Nanoscale*. 2010, 2, 2805-2810
- [2] J. Lin et al., Room temperature synthesis of hydrophilic Ln<sup>3+</sup>-doped KGdF<sub>4</sub> nanoparticles with controllable size: energy-transfer, size-dependent and color-tunable luminescence properties. *Nanoscale*. 2012, 4, 3450-3459
- [3] X.Y. Chen et al., Amine-functionalized lanthanide-doped KGdF<sub>4</sub> nanocrystals as potential optical/magnetic multimodal bioprobes. *J. Am. Chem. Soc.* 2012, 134, 1323-1330
- [4] Y.H. Huang et al., Crystal structure and up- and down-conversion properties of Yb<sup>3+</sup>,Ho<sup>3+</sup> codoped BaGdF<sub>5</sub> solid solution with different morphologies. *CrystEngComm*. 2012, 14, 3131-3141
- [5] Q. Yang et al., Upconversion luminescence and magnetic properties of ligand-free monodisperse lanthanide doped BaGdF<sub>5</sub> nanocrystals. *J. Lumin.* 2011, 131, 2544-2549
- [6] J.H. Hao et al., Down- and up-conversion photoluminescence, cathodoluminescence and paramagnetic properties of NaGdF<sub>4</sub>:Yb<sup>3+</sup>,Er<sup>3+</sup> submicron disks assembled from primary nanocrystals. *J. Mater. Chem.* 2010, 20, 3178-3185
- [7] Q. Yang et al., Modifying crystal phase, shape, size, optical and magnetic properties of monodispersed multifunctional NaYbF<sub>4</sub> nanocrystals through lanthanide doping. *CrystEngComm*. 2011, 13, 4276
- [8] C. Tan et al., Pure red upconversion photoluminescence and paramagnetic properties of Gd<sub>2</sub>O<sub>3</sub>:Yb<sup>3+</sup>,Er<sup>3+</sup> nanotubes prepared via a facile hydrothermal process. *Mater. Lett.* 2012, 73, 147
